# Supplementary material for: Clinicopathological, Prognostic, and Molecular Differences Between Microsatellite-Stable Colorectal Cancer Patients Aged ≤ 30 Years and &gt;30 Years
Source: Research Square preprint supplement (doi:10.21203/rs.3.rs-8390621/v1), 2026-01-29
Supplement: Supplementary file 1 [file 84664e53e4aa63307245e7ad.docx]

**Supplementary Table 1 Comparison of CRC Clinicopathological Data Between the Two Age Groups**

| **Variable** | **Cases** | | **≤30y (%)** | | **＞30y (%)** | ***χ2* value** | | **P value** |
| --- | --- | --- | --- | --- | --- | --- | --- | --- |
| Gender |  |  | |  | | 0.178 | 0.673 | |
| Male | 434 | 106(55.50) | | 328 (57.24) | |  |  | |
| Female | 330 | 85(44.50) | | 245 (42.76) | |
| Histology |  |  | |  | | 19.782 | ＜0.001 | |
| Adenocarcinoma | 642 | 141(73.82) | | 501(87.43) | |  |  | |
| Mucinous adenocarcinoma | 122 | 50(26.18) | | 72(12.57) | |
| Tumor differentiation |  |  | |  | | 35.324 | ＜0.001 | |
| Moderate/well | 531 | 100(52.36) | | 431(75.22) | |
| Poor | 233 | 91(47.64) | | 142(24.78) | |
| Depth of invasion |  |  | |  | | 10.789 | 0.001 | |
| T1/T2 | 122 | 16(8.38) | | 106 (18.50) | |  |  | |
| T3/T4 | 642 | 175(91.62) | | 467 (81.50) | |
| Vessel carcinoma embolus |  |  | |  | | 10.322 | 0.001  0.001 | |
| Yes | 278 | 88(46.07) | | 190 (33.16) | |  |  | |
| No | 486 | 103(53.93) | | 383 (66.84) | |  |  | |
| Lymph node metastasis |  |  | |  | | 10.810 | 0.001 | |
| Yes | 303 | 95(49.74) | | 208 (36.30) | |  |  | |
| No | 461 | 96(50.26) | | 365 (63.70) | |
| Distant metastasis |  |  | |  | |  |  | |
| Yes | 95 | 33(17.28) | | 62 (10.82) | | 5.486 | 0.019 | |
| No | 669 | 158(82.72) | | 511 (89.18) | |
| TNM stage |  |  | |  | |  |  | |
| I | 92 | 9(4.71) | | 83 (14.49) | | 17.583 | 0.001 | |
| II | 336 | 79(41.36) | | 257 (44.85) | |
| III | 251 | 78(40.84) | | 173 (30.19) | |
| IV | 85 | 25(13.09) | | 60 (10.47) | |

**Supplementary Table 2 Comparison of MSI and *KRAS* Mutation Data Between the Two Age Groups with CRC**

|  | **Cases** | **≤30y (%)** | **＞30y (%)** | ***χ2* value** | **P value** |
| --- | --- | --- | --- | --- | --- |
| MSI |  |  |  |  |  |
| MSI-H/ dMMR | 105 | 49（28.65） | 57 (12.81) | 21.772 | <0.001 |
| MSS /pMMR | 511 | 122（71.35） | 388 (87.19) |  |  |
| *KRAS* |  |  |  |  |  |
| Mutation type | 206 | 44（29.14） | 162 (38.12) | 3.910 | 0.048 |
| Wild type | 370 | 107（70.86） | 263 (61.88) |
